1  
2  
3  
4  
5  
6  
7  
8  
9  
10  
11  
12  
13  
14  
15  
16  
17  
18  
19  
20

Conduction Velocities of Excitatory Axons Innervating Parvalbumin Interneurons in Primary Somatosensory Cortex

Kate Scheuer<sup>1</sup>

Xinyu Zhao<sup>2,3</sup>

Meyer Jackson<sup>3</sup>

1. Cellular and Molecular Biology Program, 2. Waisman Center, and 3. Department of Neuroscience, University of Wisconsin-Madison, Madison, Wisconsin 53705

Corresponding author email: [meyer.jackson@wisc.edu](mailto:meyer.jackson@wisc.edu)

Conflict of interest statement: The authors declare no competing financial or non-financial interests.

Acknowledgements: National Institutes of Health Grants NS105200 and NS093866 to M.B.J. and X.Z. Thanks to Dr. Shane McMahon for methodological contributions.

21 **Abstract**

22           Timing plays a critical role in signaling throughout the nervous system. Signaling times  
23 vary widely depending on distance and speed, and timing delays influence circuit computations  
24 such as coincidence detection, synaptic integration, entrainment, temporal summation, and  
25 plasticity. Parvalbumin (PV) interneurons are a major type of inhibitory neuron with critical roles  
26 throughout the brain. Their rapid-spiking characteristics enable them to control the dynamics of  
27 neural circuits across a range of time scales. However, little is known about the factors that  
28 determine the timing of their synaptic inputs. Here, we measured the conduction velocity (CV) of  
29 excitatory axons that target PV interneurons in mouse primary somatosensory cortex. Using a  
30 genetically-encoded hybrid voltage sensor (hVOS) targeted to PV interneurons, we clocked the  
31 arrival of excitatory synaptic inputs with sub-millisecond precision in large numbers of cells  
32 across multiple layers. Arrival times varied with distance, allowing us to determine the CV of the  
33 excitatory axons. Values ranged from 28–241  $\mu\text{m}/\text{msec}$  across layers 2-5, and interlaminar CV  
34 was about twice as fast as intralaminar CV. This will enable more rapid computation within  
35 columns, while integration between columns will be slower. hVOS imaging from specific cell  
36 types offers a unique opportunity to investigate conduction in axons defined by their targets.

37

## 38 **Introduction**

39           Axonal conduction velocity (CV) influences neural computations by controlling the  
40 timing of synaptic inputs. CV impacts processes such as coincidence detection, temporal  
41 summation, entrainment, oscillations, synaptic integration, and synaptic plasticity (Bucher &  
42 Goaillard, 2011; Chomiak, Peters, & Hu, 2008; Fields, 2015; Pajevic, Basser, & Fields, 2014;  
43 Salami, Itami, Tsumoto, & Kimura, 2003). Small variations in CV can have a profound impact  
44 on synchrony and oscillation frequency (Ivanov, Polykretis, & Michmizos, 2019; Pajevic et al.,  
45 2014), and CV alterations have been linked to a variety of diseases including diabetes (Candy &  
46 Szatkowski, 2000), schizophrenia (Corcoba et al., 2015), and Down Syndrome (Olmos-Serrano  
47 et al., 2016). Demyelination associated with degenerative diseases such as multiple sclerosis has  
48 a major impact on CV (Compston & Coles, 2002; Nave, 2010; Pedroni, Minh do, Mallamaci, &  
49 Cherubini, 2014), and slower CV caused by decreased erbB signaling has been linked to bipolar  
50 disorder and schizophrenia (Roy et al., 2007).

51           CV is determined by axonal diameter and other geometric properties, as well as the  
52 capacitance and intrinsic excitability of the axonal membrane. CV varies widely between  
53 different axons and functional pathways. Axons projecting from ventral temporal cortex to the  
54 inferior colliculus conduct approximately three times faster than those projecting to caudate  
55 putamen (Chomiak et al., 2008), and hippocampal dentate granule cell (mossy fiber) axons  
56 conduct more rapidly than the axons of hilar mossy cells (Ma, Bayguinov, & Jackson, 2017). CV  
57 can also differ within the axons of the same cell. For a given ventral temporal cortical neuron,  
58 axonal branches with contralateral targets have significantly slower CV compared to axonal  
59 branches with ipsilateral targets (Chomiak et al., 2008). CV may also vary based on postsynaptic  
60 cell type. As a result of differences in CV, stimulating the same thalamic neuron activates

61 inhibitory targets before excitatory targets in somatosensory barrel cortex (BC), thus setting a  
62 very narrow time window for excitation (Kimura et al., 2010). Additionally, cell type can  
63 influence CV variability. Martinotti cells in layer 5 (L5) BC have more variable axonal CVs  
64 compared to pyramidal cells in the same layer (Shlosberg, Abu-Ghanem, & Amitai, 2008). These  
65 many variations in CV determine not only computation speed, but by influencing timing and  
66 delays, determine how circuits encode and process information.

67         Previous measurements of CV have been hindered by technical constraints arising from  
68 the difficulty of recording directly from axons, as well as low throughput, and lack of spatial and  
69 temporal resolution. Voltage imaging has provided a powerful general method for the  
70 measurement of axonal CV (Grinvald, Ross, & Farber, 1981; Hamada, Popovic, & Kole, 2017;  
71 Popovic, Foust, McCormick, & Zecevic, 2011; Sakai et al., 1991), and genetically-encoded  
72 voltage indicators have extended the approach to these problems through the addition of  
73 targeting specificity (Ma, Bayguinov, & Jackson, 2019; Panzera & Hoppa, 2019). The hybrid  
74 voltage sensor (hVOS) has sub-millisecond temporal resolution, single-cell spatial resolution  
75 (Chanda et al., 2005; Ghitani, Bayguinov, Ma, & Jackson, 2015; Ma et al., 2017), and can be  
76 targeted to specific cell populations (Bayguinov, Ma, Gao, Zhao, & Jackson, 2017; Chanda et al.,  
77 2005; Ghitani, Bayguinov, Ma, & Jackson, 2015; Ma et al., 2017). hVOS reveals voltage  
78 changes from large numbers of neurons simultaneously, and when targeted directly to axons, can  
79 resolve differences in CV based on cell type (Ma et al., 2017). In this study, we used hVOS to  
80 measure CV along excitatory axons targeting inhibitory parvalbumin (PV) interneurons in mouse  
81 BC. Because they fire rapidly and have a short membrane time constant, PV interneurons play a  
82 critical role in controlling the temporal integration window of their targets (Cardin, 2018;  
83 Ferguson & Gao, 2018; Galarreta & Hestrin, 2002; Pouille & Scanziani, 2001). They are also

84 essential for the generation of gamma oscillations, rhythmic brain waves between 30 and 80 Hz  
85 which affect sensory integration, working memory, social cognition, and other functions  
86 (Gandal, Edgar, Klook, & Siegel, 2012; Gloveli et al., 2005; Gonzalez-Burgos, Cho, & Lewis,  
87 2015; Pouille & Scanziani, 2001). Both PV interneurons and gamma oscillations have been  
88 implicated in a variety of psychiatric and neurological disorders including schizophrenia, bipolar  
89 disorder, and autism spectrum disorder (Gonzalez-Burgos et al., 2015; Lauber, Filice, &  
90 Schwaller, 2018; T. Y. Liu et al., 2012). The fast-spiking behavior of PV interneurons suggests  
91 that they are adapted to rapid computations. Thus, the speed of their activation by excitatory  
92 inputs is likely to be important to their function.

93         While PV interneurons are present throughout L2-6, their density and circuitry vary  
94 widely within the cortex (Staiger & Petersen, 2021). Properties such as excitation/inhibition  
95 balance and gamma oscillation frequency, both linked to PV interneuron function, differ based  
96 on cortical layer (Adesnik, 2018; Xu et al., 2016). We used the response latencies of PV  
97 interneurons to determine CV within and between different cortical layers. CV varied widely  
98 from  $44 \pm 15 \mu\text{m}/\text{msec}$  (mean  $\pm$  SD) for L2/3 intralaminar CV to up to  $241 \mu\text{m}/\text{msec}$  for L5  $\rightarrow$   
99 L4 CV. The mean interlaminar CV ( $111 \pm 49 \mu\text{m}/\text{msec}$ ) was about twice as fast as the mean  
100 intralaminar CV ( $57 \pm 41 \mu\text{m}/\text{msec}$ ). These differences between inter- and intralaminar CV will  
101 influence processing within the BC to make computations within columns faster than  
102 computations between columns.

103

104

105 **Results**

106 *PV interneuron responses to stimulation in L2/3, L4, and L5*

107         In mice from PV-Cre crosses with hVOS Cre reporter mice (see Methods), hVOS probe  
108 has been shown to be expressed in 83% of PV interneurons with 99.2% specificity (Bayguinov et  
109 al., 2017). In slices from these mice, BC cortical layers and barrels are visible in gradient  
110 contrast optics (Fig. 3A) and fluorescence (Fig. 3B; note that the images were taken with  
111 different cameras, so the fields of view do not align precisely). Layers were identified by cell  
112 density and cell size (Feldmeyer, 2012; Woolsey & Van der Loos, 1970), and boundaries  
113 between layers are marked with dashed lines (Figs. 1, 3, 4, Supp. Fig. 1). Fields of view  
114 generally contained L2/3 through L5 (Fig. 1). Barrels were separated into faint “hollows”  
115 (Feldmeyer, 2012; Woolsey & Van der Loos, 1970) as well as stronger fluorescence in L4, and  
116 boundaries between columns marked by dotted lines (Fig. 3, 4, Supp. Fig. 1). Electrical  
117 stimulation in L2/3, L4, and L5 elicited voltage changes in PV interneurons distributed through  
118 L2-5, as shown in the maximum amplitude heatmaps in Figs. 1A (L2/3), 1B (L4), and 1C (L5).  
119 Warmer colors correspond to greater changes in fluorescence and indicate the presence of  
120 responsive PV interneurons. Traces from locations (indicated by number and color) reveal  
121 corresponding variations in the magnitude of PV interneuron depolarization (Fig. 1D-F). Dark  
122 blue regions of the heatmap indicate the absence of responsive PV interneurons, and traces from  
123 those locations show no discernable stimulus-evoked fluorescence change.

124

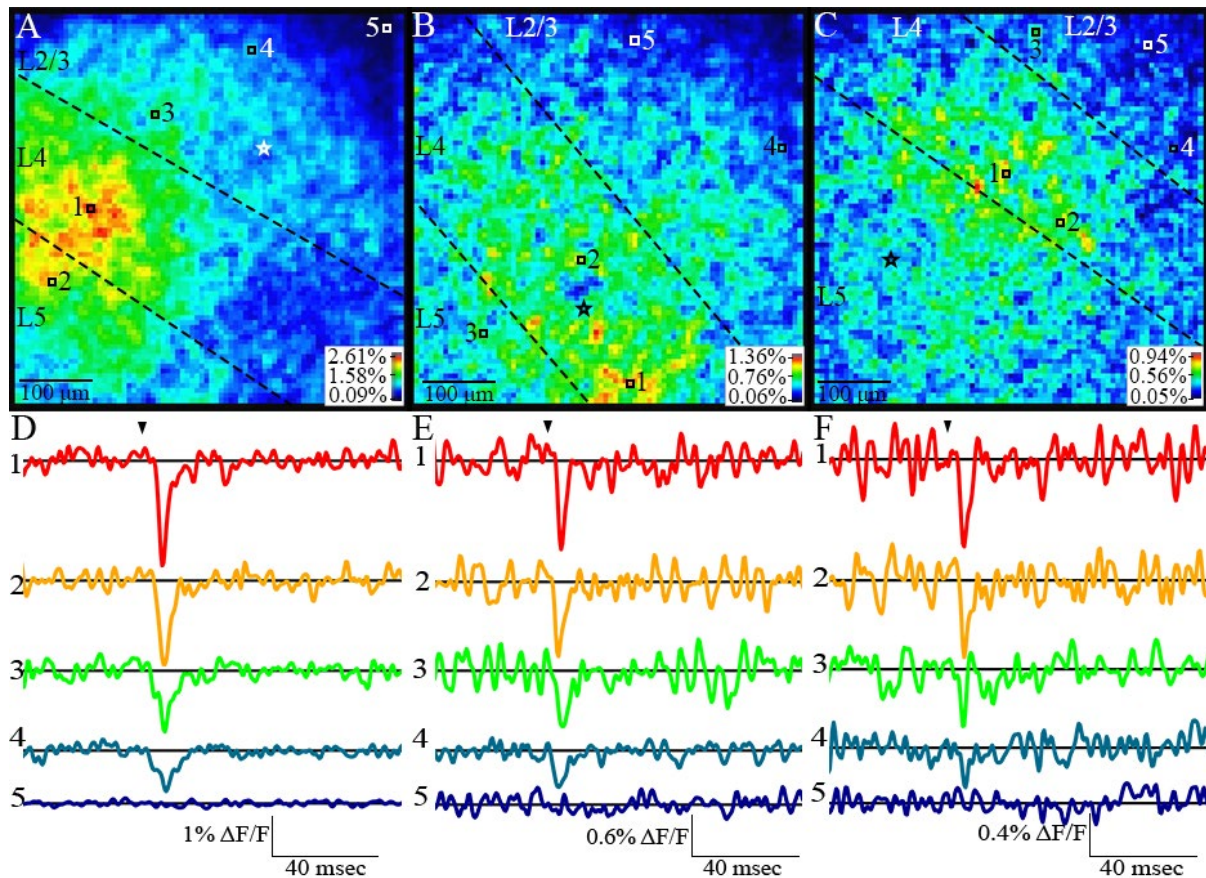

Figure 1. PV interneurons throughout a slice respond to stimulation in L2/3 (A), L4 (B), L5 (C) (stimulation sites indicated by white or black stars). In maximum amplitude heatmaps, warmer colors indicate greater changes in fluorescence. These differences in amplitude are visible in selected traces of fluorescence versus time (D-F) from the corresponding heatmaps above. Locations of traces are indicated with small white or black squares and numbers in each map. Arrowheads indicate time of stimulation.

125 Stronger stimulation elicited responses in more cells over greater distances. Heatmaps of  
126 signal-to-noise ratio (SNR) revealed that stimulation with 10  $\mu$ A rarely elicited detectable  
127 responses (Fig. 2A). Increasing the stimulus current to 20  $\mu$ A (Fig. 2B) and 60  $\mu$ A (Fig. 2C)  
128 elicited responses in more neurons over greater distances, and increasing to 100  $\mu$ A depolarized  
129 still more neurons over a broader range of distances encompassing nearly the entire field of view  
130 (Figs. 1, 2D). Responses depended on synaptic excitation, as they were blocked by 10  $\mu$ M  
131 NBQX (Figs. 2E-2F). Patterns of response spread varied but often included intralaminar  
132 responses across multiple barrel columns (Video 1) and/or interlaminar responses within and  
133 between barrel columns (Videos 2, 3). These excitatory responses spread away from the stimulus

134 electrode as action potentials propagated along excitatory efferents; the speed of this spread  
135 reflects the CV along these axons.

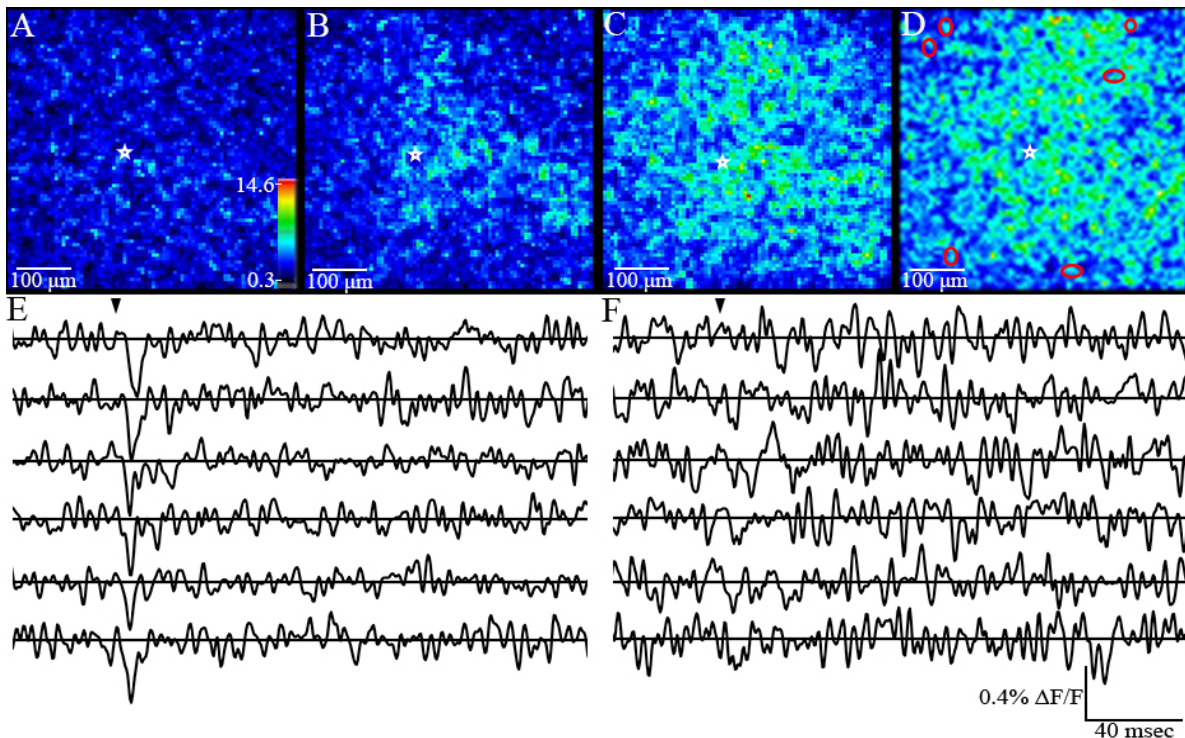

Figure 2. PV interneuron responses to different stimulation currents. Heatmaps of SNR following stimulations of 10  $\mu$ A (A), 20  $\mu$ A (B), 60  $\mu$ A (C), and 100  $\mu$ A (D). Site of stimulation is marked with a white star in A-D. Heatmap scale in (A) also applies to (B-D). A method of analysis was developed to identify individual, non-overlapping cells with clear responses (see Methods for criteria). E-F. Traces from 6 clearly identified PV interneurons (circled in red in D) show fluorescence versus time before (E) and after (F) the addition of 10  $\mu$ M NBQX. Blockade by NBQX indicates that responses are glutamatergic.

### 136 *Identification of single PV interneurons*

137 Determining CV requires the observation of responses in significant numbers of clearly  
138 identified neurons with well-resolved locations and accurately measured latencies. Fluorescence  
139 images of slices (Fig. 3B) display diffusely distributed fluorescence due to the dense arborization  
140 of PV interneurons (Fukuda & Kosaka, 2003). This makes it difficult to locate individual cells  
141 precisely. This, together with the large numbers of responsive cells, made manual analysis  
142 extremely time-consuming. We therefore developed a semi-automated method to identify  
143 responsive PV interneurons (see Methods and Supp. Fig. 1). Briefly, pixels above a baseline  
144 SNR cutoff (Supp. Fig. 1A) were divided into groups using k-means clustering of the SNR maps



145 (Supp. Fig. 1B). Putative somata were identified as contiguous groups of pixels in the same k-  
146 means cluster based on the reasoning that pixels from the same cell body are expected to have a  
147 similar SNR. A pixel group was considered to be a PV interneuron soma if its amplitude and  
148 SNR were above the cutoffs (0.1% for amplitude, 5 for SNR), did not share a face with another  
149 pixel group, and was  $< 20 \mu\text{m}$  across (consistent with the size of a PV interneuron soma  
150 (Kooijmans, Sierhuis, Self, & Roelfsema, 2020; Selby, Zhang, & Sun, 2007; Y. Wang, Gupta,  
151 Toledo-Rodriguez, Wu, & Markram, 2002)).

152 This process provided a reproducible, robust method of identifying individual PV  
153 interneurons free of subjective choices. The procedure is illustrated with a slice from which a  
154 gradient contrast image is shown in Fig. 3A and a resting fluorescence image is shown in Fig.  
155 3B. The electrode, visible in L2/3 in both images, was used to apply a stimulation of  $100 \mu\text{A}$ . A  
156 SNR heatmap revealed activated cells concentrated in L4, but cells in L2/3 and L5 also  
157 responded (Fig. 3C). This heatmap highlights 56 PV interneurons identified with our clustering  
158 method. Responsive neurons were outlined in black, or in red for locations selected for display of  
159 fluorescence versus time (Fig. 3D). The 8 selected traces show clear depolarizing responses  
160 following stimulation.

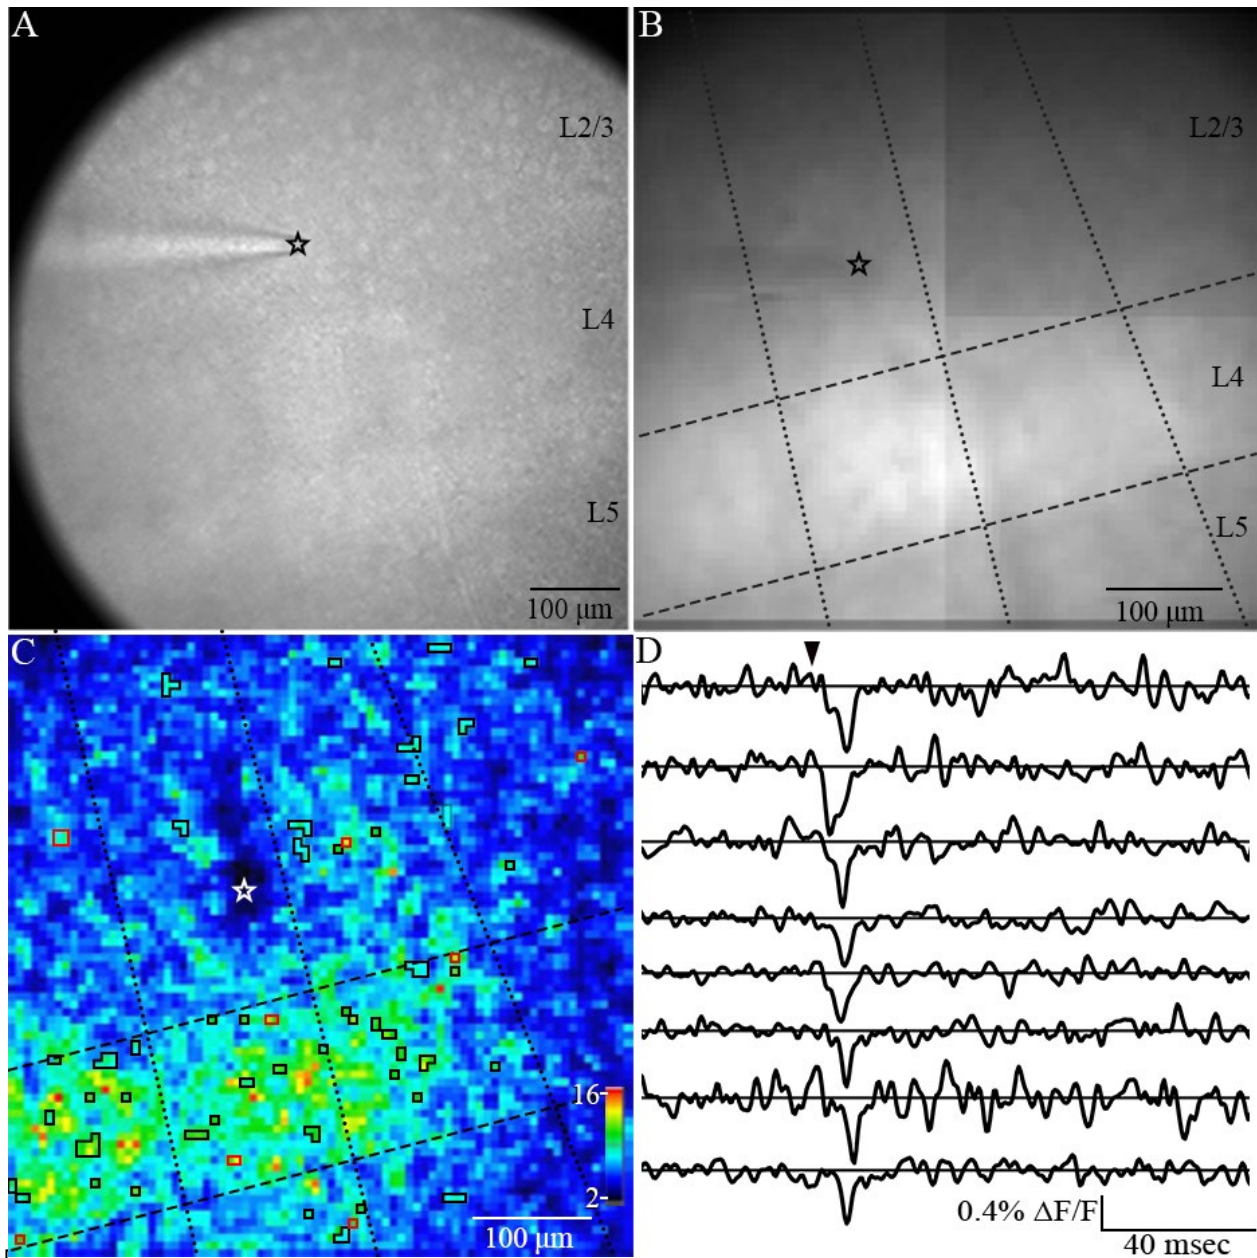

Figure 3. Identification of responsive PV interneurons. A. Gradient contrast image (taken with the Kiralux camera), and B. fluorescence image (taken with the CCD-SMQ camera) of a BC somatosensory cortical slice containing L2/3, L4 and L5. The stimulating electrode is visible in L2/3 (star at the tip, black in A and B, white in C). Layer boundaries are indicated by dashed lines, and barrel column borders are indicated with dotted lines in B-C. Following 100  $\mu$ A stimulation, responsive PV interneurons were identified based on K-means clustering of SNR and other criteria (see Methods and Supp. Fig. 1). C. A SNR heatmap shows that responsive PV interneurons span the field of view and are present in L2-5. We identified 56 responsive PV interneurons outlined in black or red. D. Traces of fluorescence versus time for the 8 PV interneurons outlined in red in C. Arrowhead above indicates stimulation time. All displayed traces show clear decreases in fluorescence following stimulation, indicating depolarization of the highlighted PV interneurons.

161 Returning to Fig. 2, this method identified 12, 96, 176, and 115 responsive PV  
162 interneurons for 10, 20, 60, and 100  $\mu$ A stimulation, respectively. The decrease in number of

163 identifiable cells with 100  $\mu$ A reflects the higher proportion of overlapping cells that could not be  
164 disambiguated. The best balance between extensive spread with large numbers of readily  
165 resolved individual cells versus too much overlap was seen with 100  $\mu$ A, so this stimulus  
166 strength was used for experiments on CV. The broad patterns of propagation are clearly evident  
167 in unprocessed data as illustrated in the heatmaps and supplemental videos described above.  
168 However, by employing method we were able to focus on somata and improve the precision of  
169 latency determination. We were thus able to analyze large numbers of cells over a broad area  
170 with a wide range of propagation distances. This analysis thus provided a robust identification of  
171 responsive neurons and, together with our choice of experimental conditions, optimized the  
172 determination of CV.

### 173 *Intra- and interlaminar conduction velocity*

174 As an action potential propagates along the axon of an excitatory neuron, PV  
175 interneurons closer to the site of initiation respond first and those farther away respond later (Fig.  
176 4A). A sequence of frames taken at one msec intervals from 2 msec to 6 msec after stimulation  
177 illustrate the spatiotemporal pattern of response spread (Fig. 4B). Note that these frames  
178 represent the SNR at successive time points, compared to the maps in Figs. 1-3 showing the  
179 maximum value within the entire post-stimulus measure window. The frames in Fig. 4B show  
180 that PV interneuron responses occur first mostly nearer the stimulating electrode in L4 (2-3  
181 msec), spread vertically both ways to L2/3 and L5 (4-5 msec), and then spread both vertically  
182 and horizontally through L2/3 and L5 (5-6 msec). Thus, a single experiment can capture  
183 propagation along different populations of axons, and because fields of view contained large  
184 numbers of responsive neurons (typically  $\sim$ 50-100), we were generally able to identify 8 or more  
185 neurons along distinct trajectories to track propagation. Fig. 4C-D presents resting fluorescence

186 and maximum SNR maps, respectively, showing the locations of responsive cells along one  
187 selected trajectory (L4 → L2/3 CV). A plot of latency versus distance fitted to a line gave us the  
188 CV as inverse of the slope (Fig. 4E). By constructing plots along different trajectories, we  
189 determined the CV of different subpopulations of axons that target PV interneurons. Focusing on  
190 PV interneurons in the same layer as the stimulation electrode (between dashed lines in Fig. 4B-  
191 D) provided a determination of intralaminar (horizontal) CV, and focusing on PV interneurons in  
192 the same barrel column as the stimulating electrode (between dotted lines in Fig. 4B-D) provided  
193 a determination of interlaminar (vertical) CV. Interlaminar CV often included an additional  
194 neighboring barrel column. This is consistent with results from rat BC indicating that excitatory  
195 axons tend to project within the same and/or neighboring columns but usually not to columns  
196 beyond the nearest neighbor (Narayanan et al., 2015).

197 In 22 out of 59 slices, plots of latency versus distance had statistically significant  
198 correlations. Among the remaining slices, negative correlations occurred only rarely (4 out of 59  
199 slices). The highest CV we were able to measure was 241  $\mu\text{m}/\text{msec}$  (19 PV interneurons), and  
200 nearly half (15) of the experiments without significant positive correlations yielded CV values  
201 above the highest measurable value. In these cases, the spread within the field of view was too  
202 fast to detect differences in latency. In most cases of such rapid propagation, latencies varied by  
203 less than 0.5 msec (average root-mean-square error = 0.427). These results indicate that in many  
204 slices, the CV was faster than can be measured over the distances accessible within our field of  
205 view. In the remainder of this work, we will focus primarily on CV measurements with  
206 significant distance-latency correlations, unless stated otherwise, and recognize that this biases  
207 our analysis uniformly toward slower conduction.

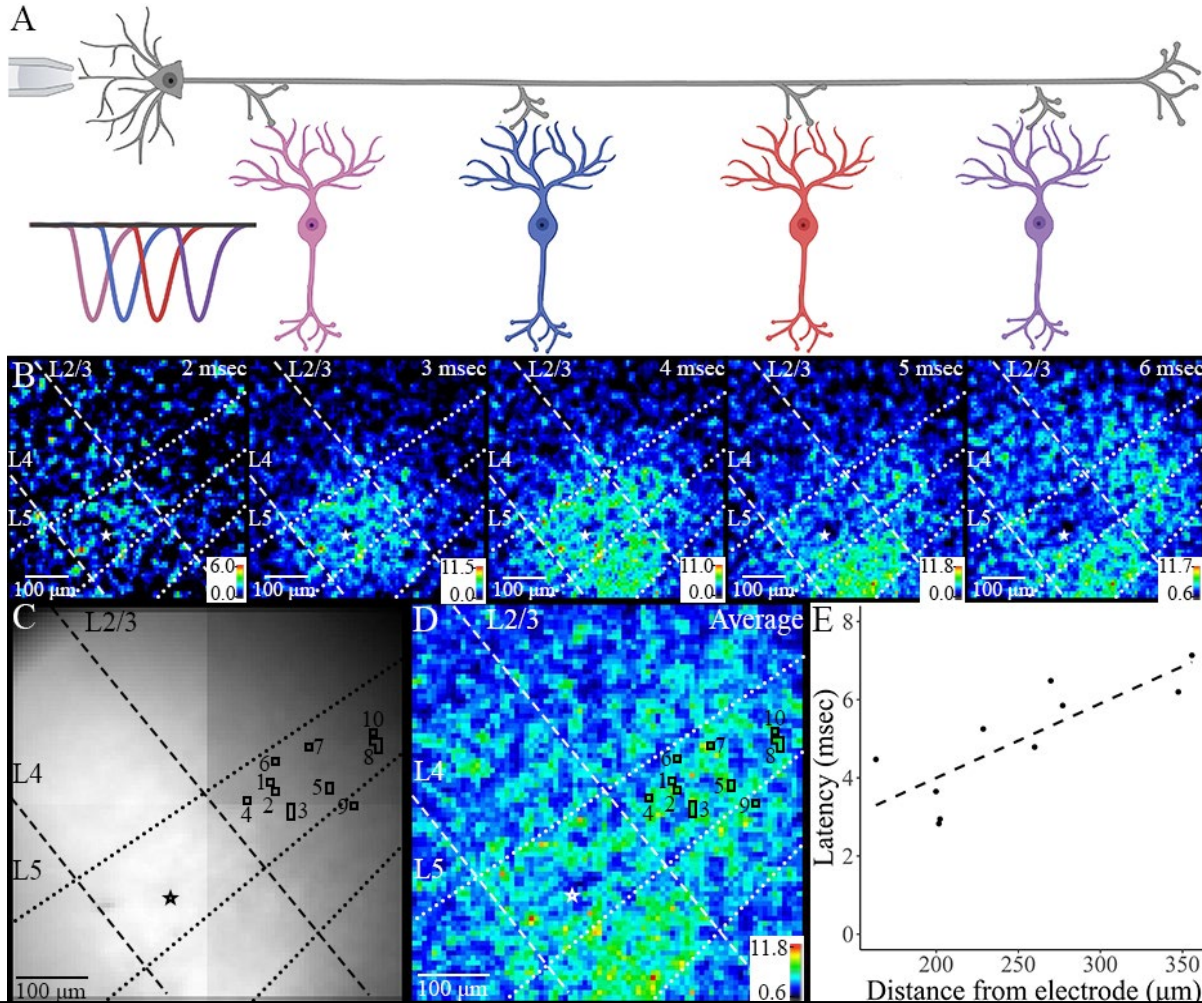

208 Stimulation in L2/3, L4, and L5 elicited responses that spread within those layers, and  
 209 latency versus distance plots yielded intralaminar CV values in L2/3 and L5. In L4 the lack of  
 210 correlation prevented us from determining the CV (N=3), and this may indicate that intralaminar

211 conduction is faster in this layer. L2/3 intralaminar CV measurements were generally slow with  
212 low variance ( $44 \pm 15 \mu\text{m}/\text{msec}$ ,  $N = 52$  PV interneurons from 4 slices). The two measured L5  
213 intralaminar CV values were very different ( $28 \mu\text{m}/\text{msec}$  and  $136 \mu\text{m}/\text{msec}$ ,  $N = 18$  PV  
214 interneurons from 2 slices), potentially reflecting differences between L5 pyramidal cell  
215 subtypes, which are known to vary in target projection layers and morphology (Larsen &  
216 Callaway, 2006). Fig. 5A shows a plot of latency versus distance with an intralaminar CV in  
217 L2/3 of  $37 \mu\text{m}/\text{msec}$  ( $t = 4.86$ ,  $p = 0.0009$ ).

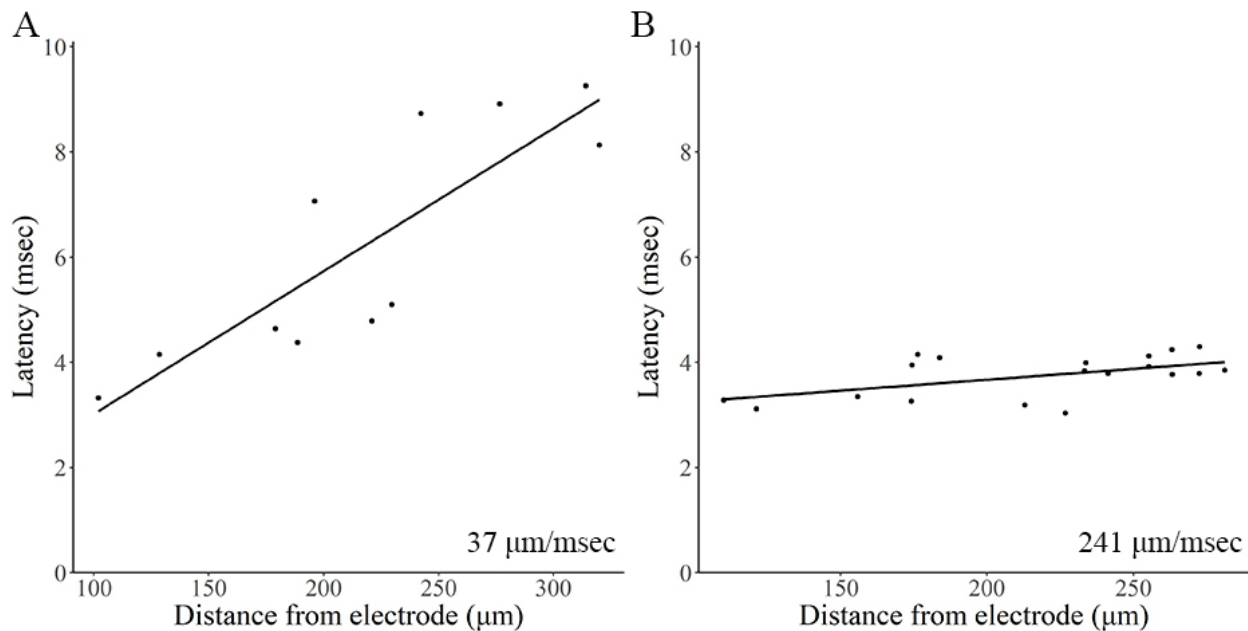

Figure 5. Latency versus intralaminar (A) or interlaminar (B) distance for two representative experiments. The steeper slope in A compared to B indicates that the L2/3 intralaminar CV represented in A ( $37 \mu\text{m}/\text{msec}$ ) is slower than the L5  $\rightarrow$  L4 interlaminar CV shown in B ( $241 \mu\text{m}/\text{msec}$ ).

218 Correlated latency-distance plots for interlaminar propagation were obtained for all pairs  
219 of layers with the exception of L5  $\rightarrow$  L2/3. Fig. 5B shows a plot for L5  $\rightarrow$  L4 conduction  
220 yielding a CV of  $241 \mu\text{m}/\text{msec}$  ( $t = 2.63$ ,  $p = 0.018$ ). For three other pairs of layers CV values  
221 were similar to one another, with L4  $\rightarrow$  L2/3 giving  $\text{CV} = 94 \pm 37 \mu\text{m}/\text{msec}$  ( $N = 62$  PV  
222 interneurons, 3 slices), L5  $\rightarrow$  L2/3 giving  $\text{CV} = 107 \pm 48 \mu\text{m}/\text{msec}$  ( $N = 57$  PV interneurons, 3  
223 slices), and L2/3  $\rightarrow$  L4 giving  $\text{CV} = 81 \pm 36 \mu\text{m}/\text{msec}$  ( $N = 93$  PV interneurons, 5 slices). Faster

224 CV values were obtained for L4 → L5 (144 μm/msec, N = 8 PV interneurons, 1 slice) and L5 →  
225 L4 (154 ± 58 μm/msec, N = 63 PV interneurons, 4 slices), including our fastest CV of 241  
226 μm/msec (Fig. 5B). The plot of latency versus distance for L5 → L4 in Fig. 5B is noticeably less  
227 steep than the plot of L2/3 intralaminar CV in Fig. 5A, supporting the view that the L5 → L4 CV  
228 is faster than the intralaminar CV.

229 Interlaminar CVs (111 ± 49 μm/msec, N = 16 slices) were about twice as fast as  
230 intralaminar CVs (57 ± 41 μm/msec, N = 6 slices), and this difference was statistically  
231 significant ( $t = -2.587$ ,  $p = 0.026$ , Fig. 6A). This difference remained significant even excluding  
232 the single particularly fast interlaminar CV value of 241 μm/msec ( $t = -2.352$ ,  $p = 0.046$ ).  
233 ANOVA followed by post-hoc testing revealed that intralaminar CV is about 2.7 times slower  
234 than L5 → L4 interlaminar CV (Fig. 6B, ANOVA:  $F = 3.085$ ,  $p = 0.046$ ; Tukey's honestly  
235 significant differences: L5 → L4 CV versus intralaminar CV:  $p = 0.025$ ). Including values for  
236 slices with CVs too fast to produce significant correlations further supports the assertion that  
237 interlaminar CV is faster than intralaminar CV. This increased the number of intralaminar CV  
238 measurements by 50% (N = 3 additional slices) but increased the number of interlaminar CV  
239 measurements by 75% (N = 12 additional slices). Interestingly, one of these three additional  
240 intralaminar CV values was from L4, possibly suggesting faster intralaminar CV in L4 than L2/3  
241 or L5. Because a higher proportion of interlaminar CV values were too fast to measure, our focus  
242 on experiments with statistically significant correlations underestimates the difference between  
243 interlaminar and intralaminar CV.

244

245

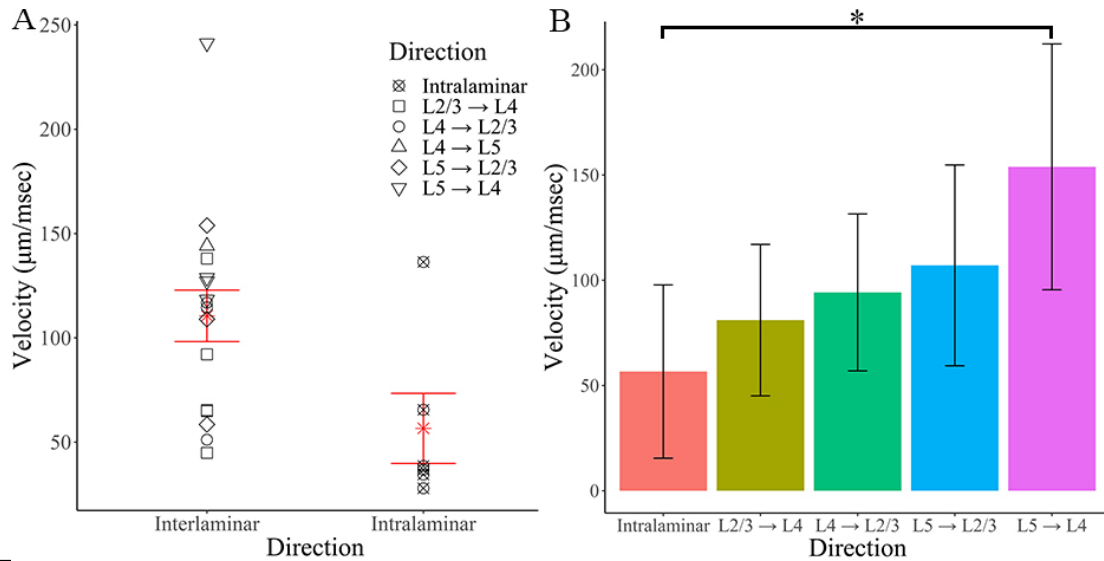

Figure 6. Inter- and intralaminar CV. A. Interlaminar CV ( $111 \pm 49 \mu\text{m/msec}$ ) is approximately twice as fast as intralaminar CV ( $57 \pm 41 \mu\text{m/msec}$ ;  $t = -2.587$ ,  $p = 0.026$ ). Symbol shapes indicate CV direction (in legend), and group mean  $\pm$  SD are shown in red. B. Intralaminar (70 PV interneurons, 6 slices), L2/3  $\rightarrow$  L4 (93 PV interneurons, 5 slices), L4  $\rightarrow$  L2/3 (62 PV interneurons, 3 slices), L5  $\rightarrow$  L2/3 (57 PV interneurons, 3 slices), and L5  $\rightarrow$  L4 (63 PV interneurons, 4 slices) CV. Error bars indicate SD. CV varies significantly based on direction ( $F = 3.085$ ,  $p = 0.046$ ), and intralaminar CV is significantly slower than L5  $\rightarrow$  L4 CV ( $p = 0.025$ ).

## 246 Discussion

247 Action potential conduction influences virtually all aspects of neural circuit function, and  
 248 many approaches have been taken to measure its velocity. Antidromic activation (Chomiak et al.,  
 249 2008; Palmer & Stuart, 2006; Salami, Itami, et al., 2003; Shlosberg et al., 2008), whole-cell  
 250 recording (Chomiak et al., 2008; Helmstaedter, Staiger, Sakmann, & Feldmeyer, 2008; Kim,  
 251 Renden, & von Gersdorff, 2013; Kimura et al., 2010; McDougall et al., 2018; Salami, Itami, et  
 252 al., 2003; Salami, Kimura, & Tsumoto, 2003; Shlosberg et al., 2008; Shu, Duque, Yu, Haider, &  
 253 McCormick, 2007) and voltage-sensitive dye imaging (Grinvald et al., 1981; Hamada et al.,  
 254 2017; Popovic et al., 2011; Sakai et al., 1991) provide accurate measurements of CV but are  
 255 limited by their low-throughput and lack of specificity. Other methods lack spatial resolution and  
 256 are poorly suited to investigations of single-cell responses (Candy & Szatkowski, 2000;  
 257 Drakesmith et al., 2019; Emmenegger, Obien, Franke, & Hierlemann, 2019; Kress & Mennerick,  
 258 2009; Radivojevic et al., 2017; Salami, Kimura, et al., 2003). The present study used the



259 genetically-encoded voltage sensor hVOS to measure CV of excitatory axons targeting PV  
260 interneurons in mouse BC. Because it can be genetically targeted, hVOS provides a unique  
261 opportunity to measure CV along axons innervating specific cell types. hVOS imaging has a  
262 rapid response time that is well-suited for measuring the sub-millisecond differences in latency  
263 required for the determination of CV. Although DPA increases membrane capacitance and thus  
264 slows propagation, this effect is small as increasing DPA from 2 to 4  $\mu\text{M}$  reduced CV by only  
265 15% in mossy fibers (Ma et al., 2017). Furthermore, this uniform effect will reduce CV  
266 proportionally in different populations of axons. In the present study it was difficult to measure  
267 faster CV values, but this could be remedied by reducing magnification to track conduction over  
268 longer distances. Our analysis has incorporated the assumption that axons follow a direct path to  
269 target PV interneurons at different distances. This adds to the biases that reduce our estimates of  
270 CV. This is probably more important for interlaminar than intralaminar conduction, as  
271 interlaminar axons sometimes extend vertically through cortical layers before branching  
272 horizontally (Larsen & Callaway, 2006; Schubert, Kotter, Luhmann, & Staiger, 2006).

273 CV values reported here are somewhat slower than in previous studies, which can  
274 probably be attributed to our exclusion of experiments without a significant correlation between  
275 latency and distance. Including these experiments yielded a value of  $304 \pm 501 \mu\text{m}/\text{msec}$  ( $N =$   
276 670 PV interneurons from 37 slices), which trends toward the higher end of the range from  
277 previous reports. Prior studies reported CV values of 140-160  $\mu\text{m}/\text{msec}$  in mouse anterior  
278 cingulate cortex (Lee, Miao, Chen, Li, & Zhuo, 2021), 150-550  $\mu\text{m}/\text{msec}$  in rat visual cortex  
279 (Murakoshi, Guo, & Ichinose, 1993), 161-240  $\mu\text{m}/\text{msec}$  in rat CA3 (Soleng, Raastad, &  
280 Andersen, 2003), about 200-300  $\mu\text{m}/\text{msec}$  in mouse BC (Shlosberg et al., 2008), 200  $\mu\text{m}/\text{msec}$  in  
281 rat BC (Helmstaedter et al., 2008), and 340  $\mu\text{m}/\text{msec}$  in rat primary somatosensory cortex

282 (Telfeian & Connors, 2003). While some of the variations in these studies can be attributed to  
283 methodological differences such as temperature, this wide range of CV values probably also  
284 reflects the diversity of cortical axons. Axonal diameter, varicosity geometry, and myelination  
285 vary widely and all have a major impact on CV. Ion channel expression also varies widely  
286 between cell types and compartments (Liu, Wang, Pitt, & Liu, 2022; Vacher, Mohapatra, &  
287 Trimmer, 2008), and by controlling the intrinsic excitability of the axonal membrane will have  
288 an impact on CV. Our measurements of CV values for different projections in the same  
289 preparation offer a perspective to the variations between prior reports, and support the view that  
290 this quantity can vary between axons in the same brain region.

291 PV interneuron microcircuitry, density, and excitation/inhibition input ratios differ  
292 between cortical layers (Adesnik, 2018; Staiger & Petersen, 2021; Xu et al., 2016), and the CV  
293 of axons innervating different PV interneurons will impact their function in cortical  
294 microcircuits. The canonical cortical circuit for information flow begins with thalamic inputs to  
295 L4 followed by transmission to L2/3 and then L5. We could follow this flow to measure a CV of  
296  $94 \pm 37 \mu\text{m}/\text{msec}$  along L4 excitatory axons targeting L2/3 PV interneurons. We also report CV  
297 along excitatory axons following noncanonical circuits. For example, L2/3 receives input from  
298 L5 (Narayanan et al., 2015; Staiger & Petersen, 2021; Thomson, West, Wang, & Bannister,  
299 2002; Vecchia et al., 2020), and for this projection we measured a CV of  $107 \pm 48 \mu\text{m}/\text{msec}$ ,  
300 which was similar to the L4  $\rightarrow$  L2/3 CV. We also measured CV along axons from L2/3 and L5  
301 to L4 PV interneurons. Although most L2/3 excitatory cells project to infragranular or  
302 supragranular cortical layers, a small portion target L4 PV interneurons (Thomson et al., 2002),  
303 including a subset of L2/3 pyramidal cells with somata near the L3/4 border (Larsen & Callaway,  
304 2006). Our L2/3  $\rightarrow$  L4 CV of  $81 \pm 36 \mu\text{m}/\text{msec}$  was slightly slower than other interlaminar CVs.

305 There is also evidence for monosynaptic L5 excitatory cell coupling to L4 fast-spiking  
306 interneurons (Vecchia et al., 2020), and our CV in this direction of  $154 \pm 58$   $\mu\text{m}/\text{msec}$  was  
307 particularly rapid. These non-canonical pathways targeting L4 PV interneurons may influence  
308 feedback to L4 and therefore impact integration of intracortical and incoming ventral  
309 posteromedial thalamic input. Intralaminar spread was observed in L2/3, L4, and L5. The very  
310 slow L2/3 intralaminar CV value reported here of  $44 \pm 15$   $\mu\text{m}/\text{msec}$  is consistent with reported  
311 values of 33-60  $\mu\text{m}/\text{msec}$  for intralaminar spread of population excitatory responses in this layer  
312 (Petersen, Grinvald, & Sakmann, 2003).

313 Interestingly, we found the average intralaminar CV (of L2/3 and L5) to be about twice  
314 as slow as the average interlaminar CV (Fig. 6A) and approximately 2.7 times slower than the  
315 interlaminar L5  $\rightarrow$  L4 CV (Fig. 6B). These differences have important implications for cortical  
316 function. Long, horizontal L2/3 pyramidal cell axons have been previously observed in multiple  
317 cortical areas across species (Bruno, Hahn, Wallace, de Kock, & Sakmann, 2009; Gilbert, 1992;  
318 Gottlieb & Keller, 1997; Keller & Asanuma, 1993; McGuire, Gilbert, Rivlin, & Wiesel, 1991).  
319 These projections are thought to connect cortical areas with similar functions, such as visual  
320 regions with similar orientation selectivity (Gilbert, 1992). In BC, L2/3 pyramidal cell  
321 intralaminar axons tend to extend across barrels corresponding to whisker rows rather than arcs,  
322 possibly reflecting a directional preference (Feldmeyer, 2012). Both regular-spiking and fast-  
323 spiking units, putative pyramidal cells and PV interneurons, respectively, show selectivity to  
324 whisking direction in BC L2/3 (Andermann & Moore, 2006; Kremer, Leger, Goodman, Brette,  
325 & Bourdieu, 2011). Our measurement of L2/3 intralaminar CV may reflect the targeting of the  
326 PV interneurons of these domains. Murine L5 intralaminar excitatory projections connect  
327 multiple barrel columns (Schubert et al., 2006; Schubert et al., 2001), and intralaminar excitatory

328 inputs to L5 pyramidal cells usually extend across one and a half barrel columns, so L5  
329 pyramidal cells may integrate information from three whiskers. Thus, the L5 intralaminar CV is  
330 likely to impact multi-whisker integration. While L5 → L4 axonal projections are uncommon  
331 (Staiger & Petersen, 2021), optogenetic stimulation of L5 pyramidal cells elicits firing in L4 fast-  
332 spiking interneurons, and inhibition of L5 pyramidal cells lengthens the reaction time in a texture  
333 discrimination test (Vecchia et al., 2020). L5 → L4 CV may therefore impact temporal sharpness  
334 of responses to sensory stimuli. Together, these results suggest that interlaminar cortical circuits  
335 process more rapidly than intralaminar circuits. Thus, precise timing of inputs to PV interneurons  
336 is likely to play an important role in computations performed within a cortical column and to be  
337 less critical in the collective computations performed by multiple columns. The higher CV for  
338 interlaminar conduction than intralaminar conduction found in the present study will thus meet  
339 distinct demands of different forms of cortical computation.

340 hVOS imaging offers a new and powerful approach to the study of CV, not only in the  
341 axons of defined cell types (Ma et al., 2017), but also in the axons defined by their targeted cell  
342 types. An important example of such specificity is that thalamocortical projections to inhibitory  
343 neurons have a faster CV than projections to excitatory cells, allowing interlaminar inhibition to  
344 activate L4 targets prior to L2/3 targets (Kimura et al., 2010). Targeting hVOS probes to  
345 different types of neurons has the potential to reveal many additional forms of axon  
346 specialization adapted to different forms of neuronal computation.

347

## 348 **Materials and Methods**

### 349 *Animals*

350 Ai35-hVOS1.5 (C57BL/6-*Gt(ROSA)26Sor<sup>tm1(CAG-hVOS1.5)Mbj</sup>*/J, JAX 031102) Cre reporter  
351 mice (Bayguinov et al., 2017) were bred with PV Cre driver mice (B6.129P2-Pvalb<sup>tm1(cre)Arbr</sup>/J,  
352 JAX 017320) to create animals with PV interneuron-specific hVOS probe expression. All animal  
353 procedures were approved by the Animal Care and Use Committee of the University of  
354 Wisconsin-Madison School of Medicine and Public Health (ACUC protocol: M005952).

### 355 *Hybrid voltage sensor (hVOS)*

356 The hVOS probe used here harbors a cerulean fluorescent protein (CeFP) tethered to the  
357 inner cell membrane by a truncated h-ras motif (Wang, Zhang, Chanda, & Jackson, 2010). Slices  
358 are perfused with 4  $\mu$ M dipicrylamine (DPA), a small anion which partitions into the cell  
359 membrane. Membrane depolarization drives DPA towards the CeFP to quench fluorescence  
360 through Förster resonance energy transfer. Repolarization drives the DPA away allowing  
361 fluorescence to return to baseline (Chanda et al., 2005; Wang et al., 2010). Fluorescence thus  
362 reports voltage changes selectively from PV interneurons because these cells express the probe  
363 with very high specificity (Bayguinov et al., 2017). DPA has a time resolution  $< 0.5$  msec  
364 (Bradley, Luo, Otis, & DiGregorio, 2009; Chanda et al., 2005) and tracks action potentials with  
365 excellent temporal fidelity (Ghitani et al., 2015; Ma et al., 2019). Parameters such as latency,  
366 amplitude, and half-width were determined from traces of fluorescence versus time (Fig. 7).  
367 Amplitude was taken as the peak change in fluorescence from the pre-stimulus baseline, and  
368 half-width as the time between rise and fall at half-maximal response. Latency is the time from  
369 stimulation to half-maximal response.

### 370 *Slice preparation*

371 Four- to ten-week-old male and female mice were deeply anesthetized with isoflurane  
372 and sacrificed via cervical dislocation. Brains were dissected and placed into ice-cold cutting  
373 solution (in mM: 10 glucose, 125 NaCl, 4 KCl, 1.25 NaH<sub>2</sub>PO<sub>4</sub>, 26 NaHCO<sub>3</sub>, 6 MgSO<sub>4</sub>, 1 CaCl<sub>2</sub>)  
374 bubbled with 95% O<sub>2</sub>/5% CO<sub>2</sub>. Coronal slices (300  $\mu$ m) were prepared using a Leica VT1200S  
375 vibratome and placed into artificial cerebrospinal fluid (ACSF, same as cutting solution except  
376 1.3 mM MgSO<sub>4</sub>, 2.5 mM CaCl<sub>2</sub>, and 4  $\mu$ M DPA) and bubbled with 95% O<sub>2</sub>/5% CO<sub>2</sub> for at least  
377 one hour.

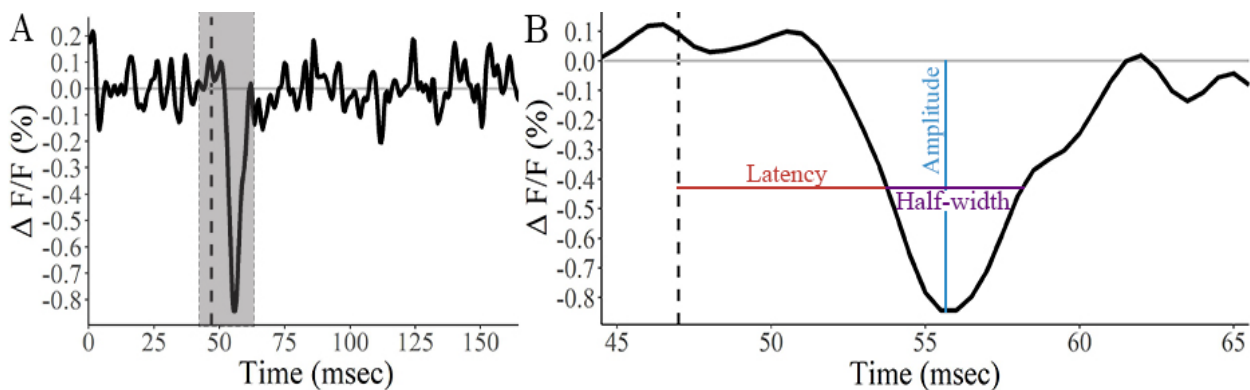

Figure 7. PV interneuron electrical activity was recorded as fluorescence using a genetically-encoded hybrid voltage sensor (hVOS). A. PV interneuron response parameters are extracted from traces of fluorescence versus time. Gray shading indicates the 20 msec measurement window expanded in B. B. Amplitude is the maximum change in fluorescence from baseline. Half-width is the time between half-maximal change in fluorescence during the rising and decay phases. Latency is the time from stimulation to half-maximal change in fluorescence of the rising phase.

### 378 *Voltage imaging*

379 Slices were continuously perfused with ACSF at room temperature and viewed using a  
380 BX51 Olympus microscope. Layer and barrel boundaries were visually identified based on both  
381 fluorescence and gradient contrast images (Feldmeyer, 2012; Woolsey & Van der Loos, 1970).  
382 Stimulus pulses (100  $\mu$ A, 180- $\mu$ sec, except Fig. 2A-C which used 10-60  $\mu$ A) were generated by a  
383 stimulus isolator (World Precision Instruments, Sarasota, Florida) and applied to various  
384 locations within BC with fire-polished, ACSF-filled KG-33 glass electrodes (King Precision  
385 Glass, Claremont, California) with tip diameter  $\sim$ 6-8  $\mu$ m. Traces of fluorescence versus time  
386 were averages of 15-30 trials. Slices were illuminated with 435 nm light using an LED light

387 source (Prizmatix, Holon, Israel). Gradient contrast images were acquired with a Kiralux  
388 (Thorlabs, Newton, New Jersey) CMOS camera; fluorescent images were acquired with this  
389 camera for better visualization, but for voltage imaging we used a CCD-SMQ camera (RedShirt  
390 Imaging, Decatur, Georgia) at a framerate of 2000 Hz and 80x80 spatial resolution. Data were  
391 acquired with a custom data acquisition and analysis program that controlled stimulation and  
392 illumination (Chang, 2006).

### 393 *Data processing and analysis*

394 Fluorescence divided by resting light intensity ( $\Delta F/F$ ) was passed through a nine-point  
395 binomial temporal filter and a spatial filter with  $\sigma = 1$ . A polynomial baseline correction was  
396 calculated using fluorescence outside of a 20 msec measurement window from 2 msec before to  
397 18 msec after the stimulus. Parameters including amplitude, half-width, and latency were  
398 calculated from traces of fluorescence versus time. Heatmaps showing SNR are each normalized  
399 to the maximum value within the field of view (with the exception of Fig. 2A-D, as explained in  
400 the figure legend). Heatmaps showing maximum amplitude and associated traces of fluorescence  
401 over time (Fig. 1) are normalized but not divided by resting light intensity.

### 402 *Responsive neuron identification*

403 We developed a semi-automated method for objective, reproducible identification of  
404 responsive PV interneurons. Supp. Fig. 1 is an extension of Fig. 3 and illustrates this process.  
405 The peak fluorescence change from baseline in the 20 msec post-stimulus time window (Fig. 7B)  
406 was calculated for each pixel and divided by the pre-stimulus root-mean-square fluorescence  
407 during a 20 msec pre-stimulus interval to give the SNR. A SNR cutoff was determined using the  
408 pre-stimulus root-mean-square values, and pixels with a response SNR < cutoff were discarded  
409 (gray pixels, Supp. Fig. 1A). k-means clustering was then performed on the SNR of the

410 remaining pixels (Supp. Fig. 1B). This served two main purposes. First, k-means clustering  
411 divides pixels into groups likely to contain responsive cells, using the criterion that only pixels  
412 with  $\text{SNR} > 5$  represent responsive cell bodies (corresponding to yellow, light blue, and medium  
413 blue clusters, Supp. Fig. 1B). Second, if multiple pixels represent one cell body, they are likely to  
414 have similar SNR values. Because each k-means cluster contains pixels with similar SNRs, two  
415 pixels in the same cluster sharing a face are likely to represent the same cell body. This method  
416 basically compared each pixel to its neighbors and grouped them based on the likelihood they  
417 represent the same cell. One or more contiguous pixels in the same SNR cluster were grouped as  
418 one cell if they were no greater than three pixels across, because each pixel measures  $6.68 \mu\text{m}$ ,  
419 and murine PV interneuron somata are approximately  $20 \mu\text{m}$  in diameter (Kooijmans et al.,  
420 2020; Selby et al., 2007; Y. Wang et al., 2002). These criteria excluded some larger clusters of  
421 pixels as potentially representing more than one cell even though they had a high SNR. For  
422 example, some yellow and orange pixels in Fig. 3C and Supp. Fig. 1A, which correspond with  
423 the highest SNR k-means cluster (yellow) in Supp. Fig. 1B, form groups which are larger than 3  
424 pixels across and therefore must contain more than one cell. Likewise, Fig. 2D had fewer  
425 identifiable responsive cells than Fig. 2C because Fig 2D had greater overlap. Pixel groups with  
426  $\text{SNR} < 5$  or amplitude  $< 0.001$  were excluded and not used to select individual responsive  
427 neurons. We also excluded groups of pixels sharing a face to ensure that a single group did not  
428 represent multiple cells. The rationale for this grouping procedure is that pixels draw from an  
429 area that is smaller than a PV interneuron cell body, and we expect SNR to be uniform over the  
430 soma of one neuron. Pixels at a cell edge will not be included due to their lower SNR. Thus, this  
431 criterion is conservative in focusing on pixels containing signals arising from distinct, spatially  
432 separated neurons.



433 *Experimental design and statistical tests*

434 Further analysis of responses from groups of pixels identified as described above was  
435 performed using R and Python. Responses with latency  $< 1$  msec were removed to exclude the  
436 effect of direct stimulation; these were generally very close to the stimulation electrode.  
437 Responses with latency or time to peak  $> 13$  msec were removed to exclude polysynaptic  
438 responses. Disynaptic responses, defined as those occurring more than 2 msec after responses  
439 from neighboring cells ( $< \sim 20$   $\mu\text{m}$ ) were also excluded. Potential outliers, defined as responses  
440 with amplitude, half-width, or latency outside the first or third quartile  $\pm 1.5$  \* interquartile  
441 range, were iteratively identified and visually verified or excluded as appropriate.

442 Each CV was based on a plot of latency versus distance with at least 8 responsive cells  $\geq$   
443 100  $\mu\text{m}$  from the stimulating electrode, spanning a range of distances  $\geq 100$   $\mu\text{m}$ . Analyses  
444 included 855 PV interneurons from 59 slices from 13 animals (6 female and 7 male).  
445 Relationships between latency and distance were evaluated with linear regression, and p-values  
446 were corrected for multiple tests using the false-discovery rate. Euclidean distance was  
447 determined between pixels on the 80x80 grid of the CCD-SMQ camera. To determine the  
448 appropriate statistical tests, normality was evaluated with a Shapiro-Wilk test, and differences in  
449 group variances were evaluated with Levene's tests. CV was normally distributed ( $W = 0.9115$ ,  
450  $p = 0.051$ ). Variance did not differ significantly for male and female animals ( $F = 1.2505$ ,  $p =$   
451  $0.277$ ), for inter- and intralaminar CV ( $F = 0.516$ ,  $p = 0.481$ ), or for CV directions (intralaminar,  
452  $L2/3 \rightarrow L4$ ,  $L4 \rightarrow L2/3$ ,  $L5 \rightarrow L2/3$ ,  $L5 \rightarrow L4$ ;  $F = 0.0519$ ,  $p = 0.994$ ). Therefore, interlaminar  
453 versus intralaminar CV, and CV for male versus female animals were compared with t-tests. CV  
454 did not differ significantly based on sex ( $t = 0.289$ ,  $p = 0.778$ ). The effect of direction on CV was

455 evaluated with ANOVA followed by post-hoc comparisons using Tukey's honestly significant  
456 differences.

457 *Code accessibility*

458 Custom software, R code, and Python code available on request.

## 459 **References**

- 460 Adesnik, H. (2018). Layer-specific excitation/inhibition balances during neuronal synchronization in the  
461 visual cortex. *J Physiol*, 596(9), 1639-1657. doi:10.1113/JP274986
- 462 Andermann, M. L., & Moore, C. I. (2006). A somatotopic map of vibrissa motion direction within a  
463 barrel column. *Nat Neurosci*, 9(4), 543-551. doi:10.1038/nn1671
- 464 Bayguinov, P. O., Ma, Y., Gao, Y., Zhao, X., & Jackson, M. B. (2017). Imaging Voltage in Genetically  
465 Defined Neuronal Subpopulations with a Cre Recombinase-Targeted Hybrid Voltage Sensor. *J*  
466 *Neurosci*, 37(38), 9305-9319. doi:10.1523/JNEUROSCI.1363-17.2017
- 467 Bradley, J., Luo, R., Otis, T. S., & DiGregorio, D. A. (2009). Submillisecond optical reporting of  
468 membrane potential in situ using a neuronal tracer dye. *J Neurosci*, 29(29), 9197-9209.  
469 doi:10.1523/JNEUROSCI.1240-09.2009
- 470 Bruno, R. M., Hahn, T. T., Wallace, D. J., de Kock, C. P., & Sakmann, B. (2009). Sensory experience  
471 alters specific branches of individual corticocortical axons during development. *J Neurosci*,  
472 29(10), 3172-3181. doi:10.1523/JNEUROSCI.5911-08.2009
- 473 Bucher, D., & Goaillard, J. M. (2011). Beyond faithful conduction: short-term dynamics,  
474 neuromodulation, and long-term regulation of spike propagation in the axon. *Prog Neurobiol*,  
475 94(4), 307-346. doi:10.1016/j.pneurobio.2011.06.001
- 476 Candy, S. M., & Szatkowski, M. S. (2000). Neuronal excitability and conduction velocity changes in  
477 hippocampal slices from streptozotocin-treated diabetic rats. *Brain Res*, 863, 298-301.  
478 doi:10.1016/s0006-8993(00)02171-5
- 479 Cardin, J. A. (2018). Inhibitory Interneurons Regulate Temporal Precision and Correlations in Cortical  
480 Circuits. *Trends Neurosci*, 41(10), 689-700. doi:10.1016/j.tins.2018.07.015
- 481 Chanda, B., Blunck, R., Faria, L. C., Schweizer, F. E., Mody, I., & Bezanilla, F. (2005). A hybrid  
482 approach to measuring electrical activity in genetically specified neurons. *Nat Neurosci*, 8(11),  
483 1619-1626. doi:10.1038/nn1558
- 484 Chang, P.-P. (2006). *Heterogeneous spatial patterns of long-term potentiation in hippocampal slices*.  
485 University of Wisconsin-Madison, Madison.
- 486 Chomiak, T., Peters, S., & Hu, B. (2008). Functional architecture and spike timing properties of  
487 corticofugal projections from rat ventral temporal cortex. *J Neurophysiol*, 100(1), 327-335.  
488 doi:10.1152/jn.90392.2008
- 489 Compston, A., & Coles, A. (2002). Multiple Sclerosis. *Lancet*, 359, 1221-1231. doi:10.1016/S0140-  
490 6736(02)08220-X
- 491 Corcoba, A., Steullet, P., Duarte, J. M., Van de Looij, Y., Monin, A., Cuenod, M., Gruetter, R., & Do, K.  
492 Q. (2015). Glutathione Deficit Affects the Integrity and Function of the Fimbria/Fornix and  
493 Anterior Commissure in Mice: Relevance for Schizophrenia. *Int J Neuropsychopharmacol*, 19(3),  
494 pyv110. doi:10.1093/ijnp/pyv110
- 495 Drakesmith, M., Harms, R., Rudrapatna, S. U., Parker, G. D., Evans, C. J., & Jones, D. K. (2019).  
496 Estimating axon conduction velocity in vivo from microstructural MRI. *Neuroimage*, 203,  
497 116186. doi:10.1016/j.neuroimage.2019.116186

- 498 Emmenegger, V., Obien, M. E. J., Franke, F., & Hierlemann, A. (2019). Technologies to Study Action  
499 Potential Propagation With a Focus on HD-MEAs. *Front Cell Neurosci*, *13*, 159.  
500 doi:10.3389/fncel.2019.00159
- 501 Feldmeyer, D. (2012). Excitatory neuronal connectivity in the barrel cortex. *Front Neuroanat*, *6*, 24.  
502 doi:10.3389/fnana.2012.00024
- 503 Ferguson, B. R., & Gao, W. J. (2018). PV Interneurons: Critical Regulators of E/I Balance for Prefrontal  
504 Cortex-Dependent Behavior and Psychiatric Disorders. *Front Neural Circuits*, *12*, 37.  
505 doi:10.3389/fncir.2018.00037
- 506 Fields, R. D. (2015). A new mechanism of nervous system plasticity: activity-dependent myelination. *Nat*  
507 *Rev Neurosci*, *16*(12), 756-767. doi:10.1038/nrn4023
- 508 Fukuda, T., & Kosaka, T. (2003). Ultrastructural study of gap junctions between dendrites of  
509 parvalbumin-containing GABAergic neurons in various neocortical areas of the adult rat.  
510 *Neuroscience*, *120*(1), 5-20. doi:10.1016/s0306-4522(03)00328-2
- 511 Galarreta, M., & Hestrin, S. (2002). Electrical and chemical synapses among parvalbumin fast-spiking  
512 GABAergic interneurons in adult mouse neocortex. *PNAS*, *99*, 12438-12443.  
513 doi:10.1073/pnas.192159599
- 514 Gandal, M. J., Edgar, J. C., Klook, K., & Siegel, S. J. (2012). Gamma synchrony: towards a translational  
515 biomarker for the treatment-resistant symptoms of schizophrenia. *Neuropharmacology*, *62*(3),  
516 1504-1518. doi:10.1016/j.neuropharm.2011.02.007
- 517 Ghitani, N., Bayguinov, P. O., Ma, Y., & Jackson, M. B. (2015). Single-trial imaging of spikes and  
518 synaptic potentials in single neurons in brain slices with genetically encoded hybrid voltage  
519 sensor. *J Neurophysiol*, *113*(4), 1249-1259. doi:10.1152/jn.00691.2014
- 520 Gilbert, C. D. (1992). Horizontal Integration and Cortical Dynamics. *Neuron*, *9*, 1-13. doi:10.1016/0896-  
521 6273(92)90215-y
- 522 Gloveli, T., Dugladze, T., Saha, S., Monyer, H., Heinemann, U., Traub, R. D., Whittington, M. A., &  
523 Buhl, E. H. (2005). Differential involvement of oriens/pyramidal interneurons in hippocampal  
524 network oscillations in vitro. *J Physiol*, *562*(Pt 1), 131-147. doi:10.1113/jphysiol.2004.073007
- 525 Gonzalez-Burgos, G., Cho, R. Y., & Lewis, D. A. (2015). Alterations in cortical network oscillations and  
526 parvalbumin neurons in schizophrenia. *Biol Psychiatry*, *77*(12), 1031-1040.  
527 doi:10.1016/j.biopsych.2015.03.010
- 528 Gottlieb, J. P., & Keller, A. (1997). Intrinsic circuitry and physiological properties of pyramidal neurons  
529 in rat barrel cortex. *Exp Brain Res*, *115*, 47-60. doi:10.1007/pl00005684
- 530 Grinvald, A., Ross, W. N., & Farber, I. (1981). Simultaneous optical measurements of electrical activity  
531 from multiple sites on processes of cultured neurons. *Proc Natl Acad Sci U S A*, *78*.  
532 doi:10.1073/pnas.78.5.3245
- 533 Hamada, M. S., Popovic, M. A., & Kole, M. H. (2017). Loss of Saltation and Presynaptic Action  
534 Potential Failure in Demyelinated Axons. *Front Cell Neurosci*, *11*, 45.  
535 doi:10.3389/fncel.2017.00045
- 536 Helmstaedter, M., Staiger, J. F., Sakmann, B., & Feldmeyer, D. (2008). Efficient recruitment of layer 2/3  
537 interneurons by layer 4 input in single columns of rat somatosensory cortex. *J Neurosci*, *28*(33),  
538 8273-8284. doi:10.1523/JNEUROSCI.5701-07.2008
- 539 Ivanov, V., Polykretis, I. F., & Michmizos, K. P. (2019). *Axonal Conduction Velocity Impacts Neuronal*  
540 *Network Oscillations*. Paper presented at the 2019 IEEE EMBS International Conference on  
541 Biomedical & Health Informatics (BHI).
- 542 Keller, A., & Asanuma, H. (1993). Synaptic Relationships Involving Local Axon Collaterals of Pyramidal  
543 Neurons in Cat Motor Cortex. *J Comp Neurol*, *336*, 229-242. doi:10.1002/cne.903360206
- 544 Kim, J. H., Renden, R., & von Gersdorff, H. (2013). Demyelination of auditory afferent axons increases  
545 the jitter of action potential timing during high-frequency firing. *J Neurosci*, *33*(22), 9402-9407.  
546 doi:10.1523/JNEUROSCI.3389-12.2013
- 547 Kimura, F., Itami, C., Ikezoe, K., Tamura, H., Fujita, I., Yanagawa, Y., Obata, K., & Ohshima, M. (2010).  
548 Fast activation of feedforward inhibitory neurons from thalamic input and its relevance to the

- 549 regulation of spike sequences in the barrel cortex. *J Physiol*, 588(Pt 15), 2769-2787.  
550 doi:10.1113/jphysiol.2010.188177
- 551 Kooijmans, R. N., Sierhuis, W., Self, M. W., & Roelfsema, P. R. (2020). A Quantitative Comparison of  
552 Inhibitory Interneuron Size and Distribution between Mouse and Macaque V1, Using Calcium-  
553 Binding Proteins. *Cereb Cortex Commun*, 1(1), tgaa068. doi:10.1093/texcom/tgaa068
- 554 Kremer, Y., Leger, J. F., Goodman, D., Brette, R., & Bourdieu, L. (2011). Late emergence of the vibrissa  
555 direction selectivity map in the rat barrel cortex. *J Neurosci*, 31(29), 10689-10700.  
556 doi:10.1523/JNEUROSCI.6541-10.2011
- 557 Kress, G. J., & Mennerick, S. (2009). Action potential initiation and propagation: upstream influences on  
558 neurotransmission. *Neuroscience*, 158(1), 211-222. doi:10.1016/j.neuroscience.2008.03.021
- 559 Larsen, D. D., & Callaway, E. M. (2006). Development of layer-specific axonal arborizations in mouse  
560 primary somatosensory cortex. *J Comp Neurol*, 494(3), 398-414. doi:10.1002/cne.20754
- 561 Lauber, E., Filice, F., & Schwaller, B. (2018). Parvalbumin neurons as a hub in autism spectrum  
562 disorders. *J Neurosci Res*, 96(3), 360-361. doi:10.1002/jnr.24204
- 563 Lee, J. A., Miao, Z., Chen, Q. Y., Li, X. H., & Zhuo, M. (2021). Multiple synaptic connections into a  
564 single cortical pyramidal cell or interneuron in the anterior cingulate cortex of adult mice. *Mol*  
565 *Brain*, 14(1), 88. doi:10.1186/s13041-021-00793-8
- 566 Liu, Wang, H. G., Pitt, G. S., & Liu, Z. J. (2022). Direct Observation of Compartment-Specific  
567 Localization and Dynamics of Voltage-Gated Sodium Channels. *J Neurosci*, 42(28), 5482-5498.  
568 doi:10.1523/JNEUROSCI.0086-22.2022
- 569 Liu, T. Y., Hsieh, J. C., Chen, Y. S., Tu, P. C., Su, T. P., & Chen, L. F. (2012). Different patterns of  
570 abnormal gamma oscillatory activity in unipolar and bipolar disorder patients during an implicit  
571 emotion task. *Neuropsychologia*, 50(7), 1514-1520. doi:10.1016/j.neuropsychologia.2012.03.004
- 572 Ma, Y., Bayguinov, P. O., & Jackson, M. B. (2017). Action Potential Dynamics in Fine Axons Probed  
573 with an Axonally Targeted Optical Voltage Sensor. *eNeuro*, 4(4), 0146-0147.  
574 doi:10.1523/ENEURO.0146-17.2017
- 575 Ma, Y., Bayguinov, P. O., & Jackson, M. B. (2019). Optical Studies of Action Potential Dynamics with  
576 hVOS probes. *Curr Opin Biomed Eng*, 12, 51-58. doi:10.1016/j.cobme.2019.09.007
- 577 McDougall, S., Vargas Riad, W., Silva-Gotay, A., Tavares, E. R., Harpalani, D., Li, G. L., & Richardson,  
578 H. N. (2018). Myelination of Axons Corresponds with Faster Transmission Speed in the  
579 Prefrontal Cortex of Developing Male Rats. *eNeuro*, 5(4), 0203-0218.  
580 doi:10.1523/ENEURO.0203-18.2018
- 581 McGuire, B. A., Gilbert, C. D., Rivlin, P. K., & Wiesel, T. N. (1991). Targets of Horizontal Connections  
582 in Macaque Primary Visual Cortex. *J Comp Neurol*, 305(3), 370-392.  
583 doi:10.1002/cne.903050303
- 584 Murakoshi, T., Guo, J., & Ichinose, T. (1993). Electrophysiological identification of horizontal synaptic  
585 connections in rat visual cortex in vitro. *Neurosci Lett*, 163(2), 211-214. doi:10.1016/0304-  
586 3940(93)90385-x
- 587 Narayanan, R. T., Egger, R., Johnson, A. S., Mansvelder, H. D., Sakmann, B., de Kock, C. P., &  
588 Oberlaender, M. (2015). Beyond Columnar Organization: Cell Type- and Target Layer-Specific  
589 Principles of Horizontal Axon Projection Patterns in Rat Vibrissal Cortex. *Cereb Cortex*, 25(11),  
590 4450-4468. doi:10.1093/cercor/bhv053
- 591 Nave, K. A. (2010). Myelination and support of axonal integrity by glia. *Nature*, 468(7321), 244-252.  
592 doi:10.1038/nature09614
- 593 Olmos-Serrano, J. L., Kang, H. J., Tyler, W. A., Silbereis, J. C., Cheng, F., Zhu, Y., Pletikos, M.,  
594 Jankovic-Rapan, L., Cramer, N. P., Galdzicki, Z., Goodliffe, J., Peters, A., Sethares, C., Delalle,  
595 I., Golden, J. A., Haydar, T. F., & Sestan, N. (2016). Down Syndrome Developmental Brain  
596 Transcriptome Reveals Defective Oligodendrocyte Differentiation and Myelination. *Neuron*,  
597 89(6), 1208-1222. doi:10.1016/j.neuron.2016.01.042
- 598 Pajevic, S., Basser, P. J., & Fields, R. D. (2014). Role of myelin plasticity in oscillations and synchrony  
599 of neuronal activity. *Neuroscience*, 276, 135-147. doi:10.1016/j.neuroscience.2013.11.007

- 600 Palmer, L. M., & Stuart, G. J. (2006). Site of action potential initiation in layer 5 pyramidal neurons. *J*  
601 *Neurosci*, *26*(6), 1854-1863. doi:10.1523/JNEUROSCI.4812-05.2006
- 602 Panzera, L. C., & Hoppa, M. B. (2019). Genetically Encoded Voltage Indicators Are Illuminating  
603 Subcellular Physiology of the Axon. *Front Cell Neurosci*, *13*, 52. doi:10.3389/fncel.2019.00052
- 604 Pedroni, A., Minh do, D., Mallamaci, A., & Cherubini, E. (2014). Electrophysiological characterization of  
605 granule cells in the dentate gyrus immediately after birth. *Front Cell Neurosci*, *8*, 44.  
606 doi:10.3389/fncel.2014.00044
- 607 Petersen, C. C. H., Grinvald, A., & Sakmann, B. (2003). Spatiotemporal Dynamics of Sensory Responses  
608 in Layer 2/3 of Rat Barrel Cortex Measured In Vivo by Voltage-Sensitive Dye Imaging  
609 Combined with Whole-Cell Voltage Recordings and Neuron Reconstructions. *J Neurosci*, *23*(4),  
610 1298-1309. doi:10.1523/JNEUROSCI.23-04-01298.2003
- 611 Popovic, M. A., Foust, A. J., McCormick, D. A., & Zecevic, D. (2011). The spatio-temporal  
612 characteristics of action potential initiation in layer 5 pyramidal neurons: a voltage imaging study.  
613 *J Physiol*, *589*(17), 4167-4187. doi:10.1113/jphysiol.2011.209015
- 614 Pouille, F., & Scanziani, M. (2001). Enforcement of temporal fidelity in pyramidal cells by somatic feed-  
615 forward inhibition. *Science*, *293*(5532), 1159-1163. doi:10.1126/science.1060342
- 616 Radivojevic, M., Franke, F., Altermatt, M., Muller, J., Hierlemann, A., & Bakkum, D. J. (2017). Tracking  
617 individual action potentials throughout mammalian axonal arbors. *Elife*, *6*.  
618 doi:10.7554/eLife.30198
- 619 Roy, K., Murtie, J. C., El-Khodor, B. F., Edgar, N., Sardi, S. P., Hooks, B. M., Benoit-Marand, M., Chen,  
620 C., Moore, H., O'Donnell, P., Brunner, D., & Corfas, G. (2007). Loss of erbB signaling in  
621 oligodendrocytes alters myelin and dopaminergic function, a potential mechanism for  
622 neuropsychiatric disorders. *PNAS*, *104*(19), 8131-8136. doi:10.1073/pnas.0702157104
- 623 Sakai, T., Komuro, H., Katoh, Y., Sasaki, H., Momose-Sato, Y., & Kamino, K. (1991). Optical  
624 Determination of Impulsive Conduction Velocity During Development of Embryonic chick  
625 Cervical Vagus Nerve Bundles. *J Physiol*, *439*, 361-381. doi:10.1113/jphysiol.1991.sp018671
- 626 Salami, M., Itami, C., Tsumoto, T., & Kimura, F. (2003). Change of conduction velocity by regional  
627 myelination yields constant latency irrespective of distance between thalamus and cortex. *PNAS*,  
628 *100*(10), 6174-6179. doi:10.1073/pnas.0937380100
- 629 Salami, M., Kimura, F., & Tsumoto, T. (2003). Postnatal Changes of Conduction Velocity of the Fibers in  
630 and out of the Mouse Barrel Cortex. *Iran Biomed J*, *7*(2), 57-63.
- 631 Schubert, D., Kotter, R., Luhmann, H. J., & Staiger, J. F. (2006). Morphology, electrophysiology and  
632 functional input connectivity of pyramidal neurons characterizes a genuine layer va in the  
633 primary somatosensory cortex. *Cereb Cortex*, *16*(2), 223-236. doi:10.1093/cercor/bhi100
- 634 Schubert, D., Staiger, J. F., Cho, N., Kotter, R., Zilles, K., & Luhmann, H. J. (2001). Layer-Specific  
635 Intracolumnar and Transcolumnar Functional Connectivity of Layer V Pyramidal Cells in Rat  
636 Barrel Cortex. *J Neurosci*, *21*(10), 3580-3592. doi:10.1523/JNEUROSCI.21-10-03580.2001
- 637 Selby, L., Zhang, C., & Sun, Q. Q. (2007). Major defects in neocortical GABAergic inhibitory circuits in  
638 mice lacking the fragile X mental retardation protein. *Neurosci Lett*, *412*(3), 227-232.  
639 doi:10.1016/j.neulet.2006.11.062
- 640 Shlosberg, D., Abu-Ghanem, Y., & Amitai, Y. (2008). Comparative properties of excitatory and  
641 inhibitory inter-laminar neocortical axons. *Neuroscience*, *155*(2), 366-373.  
642 doi:10.1016/j.neuroscience.2008.06.003
- 643 Shu, Y., Duque, A., Yu, Y., Haider, B., & McCormick, D. A. (2007). Properties of action-potential  
644 initiation in neocortical pyramidal cells: evidence from whole cell axon recordings. *J*  
645 *Neurophysiol*, *97*(1), 746-760. doi:10.1152/jn.00922.2006
- 646 Soleng, A. F., Raastad, M., & Andersen, P. (2003). Conduction latency along CA3 hippocampal axons  
647 from rat. *Hippocampus*, *13*(8), 953-961. doi:10.1002/hipo.10141
- 648 Staiger, J. F., & Petersen, C. C. H. (2021). Neuronal Circuits in Barrel Cortex for Whisker Sensory  
649 Perception. *Physiol Rev*, *101*(1), 353-415. doi:10.1152/physrev.00019.2019

- 650 Telfeian, A. E., & Connors, B. W. (2003). Widely integrative properties of layer 5 pyramidal cells support  
651 a role for processing of extralaminar synaptic inputs in rat neocortex. *Neuroscience Letters*,  
652 343(2), 121-124. doi:10.1016/s0304-3940(03)00379-3
- 653 Thomson, A. M., West, D. C., Wang, Y., & Bannister, A. P. (2002). Synaptic Connections and Small  
654 Circuits Involving Excitatory and Inhibitory Neurons in Layers 2-5 of Adult Rat and Cat  
655 Neocortex: Triple Intracellular Recordings and Biocytin Labelling In Vitro. *Cereb Cortex*, 12(9),  
656 936-953. doi:10.1093/cercor/12.9.936
- 657 Vacher, H., Mohapatra, D. P., & Trimmer, J. S. (2008). Localization and targeting of voltage-dependent  
658 ion channels in mammalian central neurons. *Physiol Rev*, 88(4), 1407-1447.  
659 doi:10.1152/physrev.00002.2008
- 660 Vecchia, D., Beltramo, R., Vallone, F., Chereau, R., Forli, A., Molano-Mazon, M., Bawa, T., Binini, N.,  
661 Moretti, C., Holtmaat, A., Panzeri, S., & Fellin, T. (2020). Temporal Sharpening of Sensory  
662 Responses by Layer V in the Mouse Primary Somatosensory Cortex. *Curr Biol*, 30(9), 1589-1599  
663 e1510. doi:10.1016/j.cub.2020.02.004
- 664 Wang, Zhang, Z., Chanda, B., & Jackson, M. B. (2010). Improved probes for hybrid voltage sensor  
665 imaging. *Biophys J*, 99(7), 2355-2365. doi:10.1016/j.bpj.2010.07.037
- 666 Wang, Y., Gupta, A., Toledo-Rodriguez, M., Wu, C. Z., & Markram, H. (2002). Anatomical,  
667 Physiological, Molecular and Circuit Properties of Nest Basket Cells in the Developing  
668 Somatosensory Cortex. *Cereb Cortex*, 12(4), 395-410. doi:10.1093/cercor/12.4.395
- 669 Woolsey, T. A., & Van der Loos, H. (1970). The Structural Organization of Layer IV in the  
670 Somatosensory Region (S1) of Mouse Cerebral Cortex. *Brain Res*, 17(2), 205-242.  
671 doi:10.1016/0006-8993(70)90079-x
- 672 Xu, X., Olivas, N. D., Ikrar, T., Peng, T., Holmes, T. C., Nie, Q., & Shi, Y. (2016). Primary visual cortex  
673 shows laminar-specific and balanced circuit organization of excitatory and inhibitory synaptic  
674 connectivity. *J Physiol*, 594(7), 1891-1910. doi:10.1113/JP271891

675
